# Supplementary material
Source: publisher site journal article supplement (https://www.spandidos-publications.com/3139/downloadSupplementary)

Figure S1. Analysis of morin-induced DNA damage in HER2-overexpressing human breast cancer SK-BR-3 cells using TUNEL assay. Cells were seeded onto 4-well Lab-Tek II Chamber Slide (Nalge Nunc International) and attached for 24 h. The cells were treated by indicated concentration of morin (50 and 200  $\mu$ M) for 48 h. TUNEL reaction was performed by DeadEnd™ Fluorometric TUNEL System (Promega Corp.) according to the manufacturer's instruction. Then, the cells were mounted by DAPI containing antifade mounting solution and covered by coverslip. TUNEL-positive cells were observed and photographed under a fluorescence microscope (Carl Zeiss).

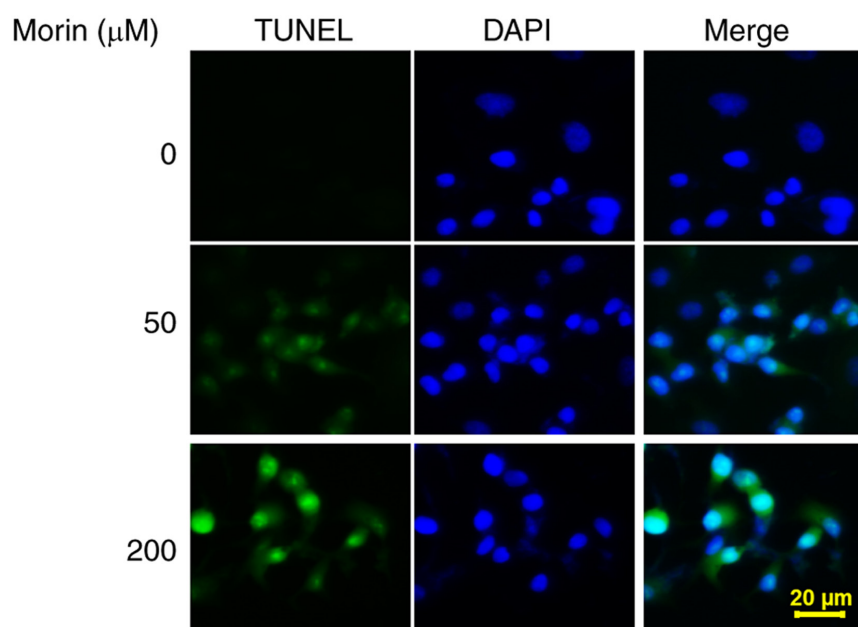

Figure S2. Effect of autophagy inhibitor, chloroquine, on cell death by morin in HER2-overexpressing human breast cancer SK-BR-3 cells. Cells were treated by various concentration of morin for 48 h. Cell viabilities were measured by using a sulforhodamine B based method. Cell viability assays were performed independently in triplicate. Data are presented as means  $\pm$  SD; \* $P$ <0.05 and \*\* $P$ <0.01. Data were statistically analyzed with one-way ANOVA test, followed by Tukey post-hoc test, using SPSS V20.0 software.

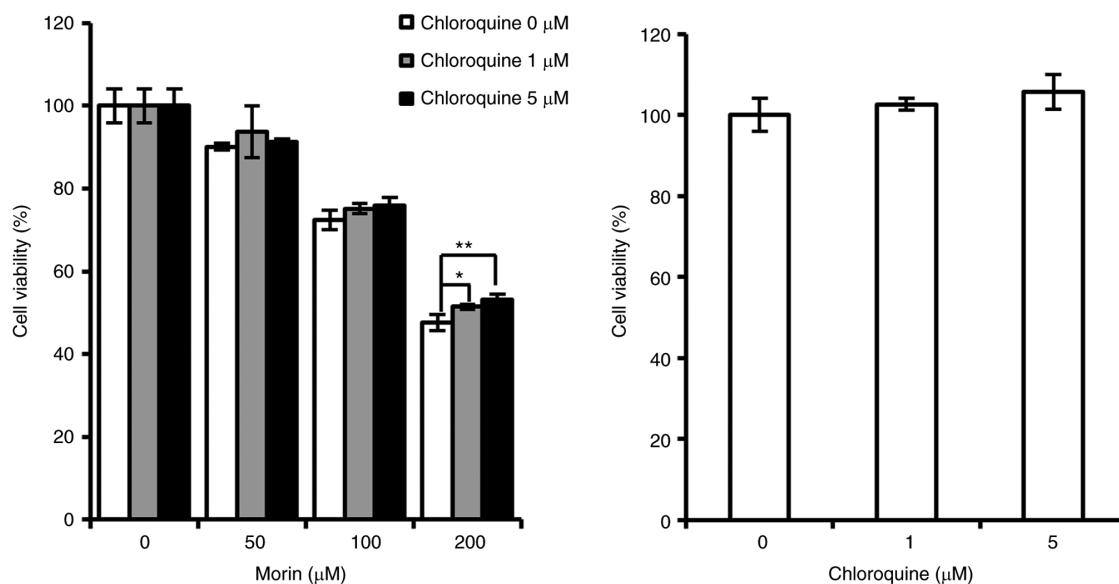

Supplement: Supplementary file 1 [file downloadSupplementary]
